# Supplementary material
Source: PubMed Central journal article supplement (PMC2994860)
Supplement: supp_djq393_JNCI-10-0442-s01.pdf [file supp_djq393_JNCI-10-0442-s01.pdf]

Supplementary Table 1. Sample sizes by Surveillance Epidemiology and End Results (SEER) registry and corresponding hospital referral regions (HRR)\*

| Registry and HRR             | HRR code      | Sample size, No. | Mean value of lagged IV† |
|------------------------------|---------------|------------------|--------------------------|
| Atlanta                      | 144           | 613              | -0.047                   |
| California                   |               |                  |                          |
| Los Angeles/Ventura          | 56, 096       | 2,486            | -0.033                   |
| Chico–Reno, NV‡              | 31, 280       | 65               | -0.069                   |
| Modesto–Stockton‡            | 58, 091       | 133              | -0.038                   |
| Bakersfield‡                 | 25            | 89               | -0.069                   |
| Orange‡                      | 23            | 328              | -0.074                   |
| Contra Costa                 | 33            | 162              | -0.010                   |
| Fresno‡                      | 43            | 188              | -0.010                   |
| Napa–Santa Rosa‡             | 62, 089       | 53               | 0.036                    |
| Alameda                      | 65            | 228              | 0.013                    |
| Palm Springs–San Bernardino‡ | 69, 079       | 174              | -0.035                   |
| Reading‡                     | 73            | 71               | -0.064                   |
| Sacramento‡                  | 77            | 223              | -0.019                   |
| Salinas–Santa Cruz           | 78, 097       | 153              | -0.057                   |
| San Diego‡                   | 80            | 307              | 0.051                    |
| San Francisco                | 81            | 306              | 0.058                    |
| San Jose–San Mateo           | 82, 085       | 505              | 0.091                    |
| San Luis Obispo‡             | 83            | 98               | -0.099                   |
| Santa Barbara‡               | 86            | 77               | -0.080                   |
| Connecticut                  |               |                  |                          |
| Bridgeport                   | 109           | 249              | 0.028                    |
| Hartford                     | 110           | 485              | 0.033                    |
| New Haven                    | 111           | 334              | 0.194                    |
| Detroit                      |               |                  |                          |
| Ann Arbor                    | 232           | 323              | -0.001                   |
| Dearborn                     | 233           | 298              | 0.036                    |
| Detroit                      | 234           | 936              | 0.029                    |
| Pontiac–Flint–Grand Rapids   | 244, 235, 236 | 134              | -0.042                   |
| Royal Oak                    | 245           | 359              | 0.011                    |
| Hawaii-Honolulu              | 150           | 237              | 0.006                    |
| Iowa                         |               |                  |                          |
| Cedar Rapids–Dubuque         | 190, 193      | 217              | -0.096                   |
| Davenport                    | 191           | 120              | -0.057                   |
| Des Moines                   | 192           | 587              | -0.002                   |
| Iowa City                    | 194           | 185              | 0.101                    |
| Sioux City–Sioux Falls       | 196, 371      | 197              | -0.004                   |
| Waterloo–Mason City          | 197, 195      | 247              | -0.062                   |
| Omaha                        | 278           | 112              | -0.057                   |

|                                 |               |     |        |
|---------------------------------|---------------|-----|--------|
| Kentucky†                       |               |     |        |
| Louisville–Covington            | 205, 203      | 292 | -0.049 |
| Lexington–Huntington, WV        | 204, 444      | 364 | 0.145  |
| Owensboro–Paducah–<br>Nashville | 207, 208, 380 | 168 | -0.139 |
| Louisiana†                      |               |     |        |
| Houma–Lafayette                 | 212, 213      | 160 | -0.050 |
| Baton Rouge–Metairie            | 210, 216      | 213 | -0.124 |
| Alexandria                      | 209           | 77  | 0.031  |
| Lake Charles                    | 214           | 60  | -0.048 |
| Monroe                          | 217           | 67  | 0.010  |
| New Orleans                     | 218           | 63  | 0.067  |
| Shreveport                      | 219           | 135 | 0.034  |
| New Mexico                      |               |     |        |
| Albuquerque                     | 293           | 587 | 0.046  |
| El Paso–Lubbock                 | 393, 400      | 273 | -0.016 |
| New Jersey†                     |               |     |        |
| Camden                          | 283           | 360 | 0.088  |
| Hackensack                      | 284           | 159 | -0.006 |
| Morristown                      | 285           | 170 | 0.038  |
| New Brunswick                   | 288           | 114 | 0.130  |
| Newark                          | 289           | 212 | 0.078  |
| Paterson–Ridgewood              | 291, 291      | 90  | -0.062 |
| Philadelphia                    | 356           | 61  | 0.092  |
| Seattle                         |               |     |        |
| Everett                         | 437           | 160 | -0.055 |
| Olympia                         | 438           | 87  | -0.061 |
| Seattle                         | 439           | 840 | -0.013 |
| Tacoma                          | 441           | 249 | -0.078 |
| Utah                            |               |     |        |
| Ogden                           | 421           | 140 | 0.006  |
| Provo–Salt Lake City            | 422, 423      | 874 | -0.035 |

\* IV = instrumental variable.

† Difference between predicted percentage of patients receiving conservative management and actual percentage receiving conservative management, over all years.

‡2000-2003 only.
