# Supplementary material
Source: PubMed Central journal article supplement (PMC2994860)
Supplement: supp_djq393_JNCI-10-0442-s02.pdf [file supp_djq393_JNCI-10-0442-s02.pdf]

Supplementary Table 2. First-state instrumental variable equation (with the dependent variable as received conservative management)

| Variable label                                                                    | Estimate                | Standard error         | <i>P</i> * |
|-----------------------------------------------------------------------------------|-------------------------|------------------------|------------|
| Intercept                                                                         | 1.426                   | 0.110                  | <.001      |
| Instrument (lagged area difference)                                               | 2.363                   | 0.226                  | <.001      |
| Age at diagnosis 70-74 y vs 66-69 y                                               | 0.467                   | 0.039                  | <.001      |
| Black non-Hispanic vs white non-Hispanic                                          | 0.588                   | 0.062                  | <.001      |
| Hispanic vs white non-Hispanic                                                    | -0.116                  | 0.079                  | .144       |
| Other race vs white non-Hispanic                                                  | 0.444                   | 0.083                  | <.001      |
| Married vs single                                                                 | -0.701                  | 0.044                  | <.001      |
| Stage T2 vs T1                                                                    | 0.200                   | 0.041                  | <.001      |
| Grade moderately differentiated vs well differentiated                            | -0.544                  | 0.069                  | <.001      |
| Grade poorly differentiated vs well differentiated                                | -1.153                  | 0.083                  | <.001      |
| Grade unknown vs well differentiated                                              | 1.432                   | 0.136                  | <.001      |
| NCI comorbidity index of 0 vs. unknown                                            | -0.934                  | 0.156                  | <.001      |
| NCI comorbidity index of 1 vs unknown                                             | -0.887                  | 0.166                  | <.001      |
| NCI comorbidity index of $\geq 2$ vs unknown                                      | -0.808                  | 0.169                  | <.001      |
| Inflation-adjusted reimbursement in the year before diagnosis (2003 prices)       | $-5.51 \times 10^{-06}$ | $3.42 \times 10^{-06}$ | .108       |
| Any inpatient, outpatient or carrier claims in year before diagnosis vs no claims | -0.964                  | 0.166                  | <.001      |
| Diagnosed in 1997 vs 1996                                                         | -0.151                  | 0.083                  | .069       |
| Diagnosed in 1998 vs 1996                                                         | 0.047                   | 0.084                  | .581       |
| Diagnosed in 1999 vs 1996                                                         | 0.080                   | 0.086                  | .353       |
| Diagnosed in 2000 vs 1996                                                         | 0.224                   | 0.088                  | .011       |
| Diagnosed in 2001 vs 1996                                                         | 0.262                   | 0.075                  | .001       |
| Diagnosed in 2002 vs 1996                                                         | 0.433                   | 0.075                  | <.001      |
| Diagnosed in 2003 vs 1996                                                         | 0.483                   | 0.077                  | <.001      |

\*A two-sided Wald chi-square test was used.
